# Supplementary material for: Phenotypic and genotypic characterization of azacitidine-sensitive and resistant SKM1 myeloid cell lines
Source: PubMed Central journal article supplement (PMC4147331; doi:10.18632/oncotarget.2024), 2014-05-27
Supplement: oncotarget-05-4384-s001.pdf [file oncotarget-05-4384-s001.pdf]

## Phenotypic and Genotypic Characterization of Azacitidine-Sensitive and Resistant SKM1 Myeloid Cell Lines

### Supplementary Material

**Supplemental Table 1: Sequences of the primers used for mutational analysis of MDS cell lines**

|               | Forward primer             | Reverse primer                  |
|---------------|----------------------------|---------------------------------|
| <b>SRSF2</b>  |                            |                                 |
| SRSF2_ex1     | GGCCGCCACTCAGAGCTA         | ACCTCACAAAGGTCCGCG              |
| <b>ZRSR2</b>  |                            |                                 |
| ZRSR2_ex1-2   | TCTCGACTCTTAGGCCCGCCCTTT   | CCTTCTGACACTGGGGCTTCAAG         |
| ZRSR2_ex3     | GCTTGTGTTGTACCAAAGAAGG     | ACAGAAGACTGGTACTGGTTAG          |
| ZRSR2_ex4-5   | TTTGCTCTCGTGTGTGTG         | CCCAAACCTCTGACATGCCTA           |
| ZRSR2_ex6     | TGTTCCACTTGAGATTCTTAACCA   | GATCTAACTAACCTACCACG            |
| ZRSR2_ex7     | CTTGATTGCCTGTTCCAACCT      | GTCTGATGACGGACATTTGA            |
| ZRSR2_ex8     | ATGCCTGGTCTAAAGCAGTT       | TTATAGAGTGCTAGCGTGCC            |
| ZRSR2_ex9     | GCAAGAGTCAGCTAGTATCT       | TCCAGTGGAATAATCCAGAA            |
| ZRSR2_ex10    | GAACCTGGTGGTCTACAAT        | TCCCCAAAGAATATCCCTT             |
| ZRSR2_ex11    | AGTGCTGTTTCATCACTGTGC      | AACCCATCTGCGTTCATAGC            |
| <b>U2AF1</b>  |                            |                                 |
| U2AF1_ex2     | GCTGCTGACATATTCATGTG       | TCTCAGACCTTCCACTGGAAGT          |
| U2AF1_ex6     | AAAGTCTTATTAAGCGTGGATGG    | CGAACTGTGCTCAGTCACGTC           |
| <b>SF3B1</b>  |                            |                                 |
| SF3B1_ex13-14 | TGATGTGAAAGTGTAGCTTC       | GGCAACATAGTAAGACCCTGT           |
| SF3B1_ex15-16 | TGTTGGGGCATAGTTAAACCT      | TGTTAGAACCATGAAACATATCCA        |
| <b>KRAS</b>   |                            |                                 |
| KRAS_ex2      | AAAGGTACTGGTGGAGTATTTGA    | CATGAAAATGGTCAGAGAAACC          |
| KRAS_ex3      | CAGACTGTGTTTCTCCCTTC       | TAAACCCACCTATAATGGTG            |
| <b>NRAS</b>   |                            |                                 |
| NRAS_ex2      | GGCCGATATTAATCCGGTGT       | TGGGTAAAGATGATCCGACA            |
| NRAS_ex3      | CAAGTGGTTATAGATGGTGA AAC   | CAAATGACTTGCTATTATTGATG         |
| <b>CBL</b>    |                            |                                 |
| CBL_ex8       | GGACCCAGACTAGATGCTTTCT     | GAAAATACATTTCTAGAGATCAAAA<br>A  |
| CBL_ex9       | CTGGCTTTTGGGGTTAGGTT       | TCGTTAAGTGTTTTACGGCTTT          |
| <b>RUNX1</b>  |                            |                                 |
| RUNX1_ex3     | AGCTGCTTGTGAAGATCCG        | GCCTGTCTCCCACCACCCTCTC          |
| RUNX1_ex4     | CATCCCTGATGTCTGCATTTGTCC   | GTGGGTTTGTGGCATGAAACG           |
| RUNX1_ex5     | TGTTCCAGGCCACCAACCTCATT    | CCCAAGGAATCTGAGACATGGTCC        |
| RUNX1_ex6     | CCTGCTCCCCACAATAG          | GGTGCAGGAGAGGCGGGCAG            |
| RUNX1_ex7     | AATCCCACCCACTTTACAT        | CTCAGCTGCAAAGAATGTGT            |
| RUNX1_ex8     | TCCGTTCTCTTGCCCGC          | GGCCTGGCGCCTCAGTA               |
| <b>EZH2</b>   |                            |                                 |
| EZH2_ex2      | GGTGATCATATTCAGGCTGG       | AAACTTATTGAACTTAGGAGGGG         |
| EZH2_ex3      | TTTCTCCTTTCTCTCCTTCA       | TCCAATAGCATAAACCAAAAAGATG       |
| EZH2_ex4      | GGCTACAGCTTAAGGTTGTCTT     | CTGTCTTGATTACCTTGACAAT          |
| EZH2_ex5      | AAATCTGGAGA ACTGGGTAAAGAC  | TCATGCCCTATATGCTTCATAAAC        |
| EZH2_ex6      | AGGCTATGCCTGTTTTGTCC       | AAAAGAGAAAGAAGAACTAAGCCC        |
| EZH2_ex7      | CTGACTGGCATTCCACAGAC       | AAGTGTAGTGGCTCATCCGC            |
| EZH2_ex8      | CATCAAAAAGTAACACATGGAAACC  | TTGTAATAAATGATAGCACTCTCCAA<br>G |
| EZH2_ex9      | TCCATTAATTGACTTTTCCAGTG    | ACCTCCACCAAAGTGCAAAG            |
| EZH2_ex10     | TTCTCTCCATCAAAAATGAGTTTTAG | TCCTCACAAACAGAACTTTAC           |

|                       |                                       |                                         |
|-----------------------|---------------------------------------|-----------------------------------------|
| EZH2_ex11             | GAGTTGTCCTCATCTTTTCGC                 | CCAAGAATTTTCTTTGTTTGGAC                 |
| EZH2_ex12             | AAGAATGGTTTGCCTAATAAGAC               | CCTTGCCTGCAGTGTCTATC                    |
| EZH2_ex13             | TCTTGGCTTTAACGCATTCC                  | CAAATTGGTTTAAACATACAGAAGGC              |
| EZH2_ex14             | TGATCGTTTCCATCTCCCTG                  | AGGGAGTGCTCCCATGTTC                     |
| EZH2_ex15             | GAGAGTCAGTGAGATGCCAG                  | TTTGCCCCAGCTAAATCATC                    |
| <b>Forward primer</b> |                                       | <b>Reverse primer</b>                   |
| EZH2_ex16             | TTTTTGATGATGTGATTGTGTTT               | TGGCAATTCATTTCCAATCA                    |
| EZH2_ex17             | TTCTGTCAGGCTTGATCACC                  | CTCGTTTCTGAACACTCGGC                    |
| EZH2_ex18             | AGGCAAACCTGAAGAACTG                   | TTCCAATTCTCACGTCAAAGGTA                 |
| EZH2_ex19             | CCGTCTTCATGCTCACTGAC                  | AAAAACCCTCCTTTGTCCAGA                   |
| EZH2_ex20             | CTTCAGCAGGCTTTGTTGTG                  | GGGGAGGAGGTAGCAGATG                     |
| <b>ASXL1</b>          |                                       |                                         |
| ASXL1_ex12_1          | AGGTCAGATCACCCAGTCAGTT                | TAGCCCATCTGTGAGTCCAAGT                  |
| ASXL1_ex12_2          | AGAGGACCTGCCTTCTCTGAGAAA              | TTCGATGGGATGGGTATCCAATGC                |
| ASXL1_ex12_3          | ACTTGAACCAAGGCTCTCGT                  | GCAACCATCCCATCTGTCCTTGTA                |
| ASXL1_ex12_4          | GGTGGACAAGGATGAGAAACCCAA              | TGTCCTGTGACATAGCACGGACTT                |
| ASXL1_ex12_5          | TGGATTCCAAAGAGCAGTTCTTTC              | CATGACAAAGGGCATCCCTTCCAA                |
| ASXL1_ex12_6          | ACAGGAAAGCTACTGGGCATAGTC              | CAAGAGTGCTCCTGCCTAAAGAGT                |
| <b>DNMT3A</b>         |                                       |                                         |
| DNMT3A_ex23           | TCCTGCTGTGTGGTTAGACG                  | TTTTTCTCTTCTGGGTGCTGA                   |
| <b>TET2</b>           |                                       |                                         |
| TET2_fragment1        | TGAACTTCCCACATTAGCTGGT                | GAAACTGTAGCACCATTAGGCATT                |
| TET2_fragment2        | CAAAGGCTAATGGAGAAAGACGTA              | GCAGAAAAGGAATCCTTAGTGAACA               |
| TET2_fragment3        | GCCAGTAACTAGCTGCAATGCTAA              | TGCCTCATTACGTTTTAGATGGG                 |
| TET2_fragment4        | GACCAATGTCAGAACACCTCAA                | TTGATTTTGAATACTGATTTTACCA               |
| TET2_fragment5        | TTGCAACATAAGCCTCATAAACAG              | ATTGGCCTGTGCATCTGACTAT                  |
| TET2_fragment6        | GCAACTTGCTCAGCAAAGGTA                 | TGCTGCCAGACTCAAGATTTAAA                 |
| TET2_fragment7        | ATACTACATATAATACATTCTAATTCCTCACT<br>G | TGTTTACTGCTTTGTGTGTGAAGG                |
| TET2_fragment8        | CATTTCTCAGGATGTGGTCATAGAAT            | CCCAATTCTCAGGGTCAGATTTA                 |
| TET2_fragment9        | AGACTTTATGTATCTTTCATCTAGCTCTGG        | ACTCTCTTCTTTCAACCAAAGATT                |
| TET2_fragment10       | ATGCCACAGCTTAATACAGAGTTAGAT           | TGTCATATTGTTCACTTCATCTAAGCT<br>AAT      |
| TET2_fragment11       | GATGCTTTATTTAGTAATAAAGGCACCA          | TTCAACAATTAAGAGGAAAAGTTAGA<br>ATAATATTT |
| TET2_fragment12       | TGTCATTCCATTTTGTCTGGATA               | AAATTACCAGTCTTGCATATGTCTT               |
| TET2_fragment13       | CTGGATCAACTAGGCCACCAAC                | CCAAAATTAACAATGTTTCAATTTTACAA<br>TAAGAG |
| TET2_fragment14       | GCTCTTATCTTTGCTTAATGGGTGT             | TGTACATTTGGTCTAATGGTACAAC<br>G          |
| TET2_fragment15       | AATGGAAACCTATCAGTGGACAAC              | TATATATCTGTTGTAAGGCCCTGTGA              |
| TET2_fragment16       | CAGAGCTTTCTGGATCCTGACAT               | GCCCACGTCCATGAGAACTATACTAC              |
| TET2_fragment17       | TCTAAGCTCAGTCTACCACCCATCCATACA        | TGCTCGCTGTCTGACCAGACCTCATC<br>G         |
| <b>IDH1</b>           |                                       |                                         |
| IDH1-R132             | GTGGCACGGTCTTCAGAGA                   | TTCATACCTTGCTTAATGGGTGT                 |
| <b>IDH2</b>           |                                       |                                         |
| IDH2-R140             | TGAAAGATGGCGGCTGCAGT                  | GGGGTGAAGACCATTTTGAA                    |
| IDH2-R172             | AGCCATCATCTGCAAAAC                    | TGTGGCCTTGACTGCAGAG                     |
| <b>TP53</b>           |                                       |                                         |
| TP53_ex5              | AAGCTCCTGAGGTGTAGACGC                 | GGGCCAGACCTAAGAGCAATC                   |
| TP53_ex6              | CTGCTCAGATAGCGATGGTG                  | AGGCCCTTAGCCTCTGTAAGC                   |
| TP53_ex7              | CATCCTGGCTAACGGTGAAC                  | AGAAATCGGTAAGAGGTGGGC                   |
| TP53_ex8              | GTTGGGAGTAGATGGAGCCTG                 | TTGGGCAGTGCTAGGAAAGAG                   |

**Supplemental Table 2 :List of the best 89 genes discriminating WT from AZA-Resistant (R) cells. Affymetrix Probe Set IDs and NCBI Gene Accessions give access to transcripts. Logarithm (base 2) of the ratio (R / WT) are represented.**

**Down-Regulated Genes**

| Gene Symbol | Probe Set ID | Gene Accession | Cytoband      | Gene Description                                              | log <sub>2</sub> (R /WT) |
|-------------|--------------|----------------|---------------|---------------------------------------------------------------|--------------------------|
| CLC         | 8036755      | NM_001828      | 19q13.1       | Charcot-Leyden crystal protein                                | -7,60                    |
| CD33        | 8030804      | NM_001772      | 19q13.3       | CD33 molecule                                                 | -4,66                    |
| BPI         | 8062444      | NM_001725      | 20q11.23-q12  | bactericidal/permeability-increasing protein                  | -4,30                    |
| FXYD5       | 8027778      | NM_144779      | 19q12-q13.1   | FXYD domain containing ion transport regulator 5              | -4,01                    |
| CCDC92      | 7967486      | NM_025140      | 12q24.31      | coiled-coil domain containing 92                              | -3,76                    |
| IGFBP2      | 8048205      | NM_000597      | 2q33-q34      | insulin-like growth factor binding protein 2, 36kDa           | -3,69                    |
| LPL         | 8144917      | NM_000237      | 8p22          | lipoprotein lipase                                            | -3,68                    |
| S100A8      | 7920244      | NM_002964      | 1q21          | S100 calcium binding protein A8                               | -3,66                    |
| IFITM1      | 7937335      | NM_003641      | 11p15.5       | interferon induced transmembrane protein 1 (9-27)             | -3,59                    |
| FCN1        | 8165011      | NM_002003      | 9q34          | ficolin (collagen/fibrinogen domain containing) 1             | -3,53                    |
| HP          | 7997188      | NM_005143      | 16q22.1       | haptoglobin                                                   | -3,53                    |
| CRABP1      | 7985159      | NM_004378      | 15q24         | cellular retinoic acid binding protein 1                      | -3,44                    |
| AES         | 8032576      | NM_198969      | 19p13.3       | amino-terminal enhancer of split                              | -3,42                    |
| FAM163A     | 7907769      | NM_173509      | 1q25.2        | family with sequence similarity 163, member A                 | -3,41                    |
| CD37        | 8030277      | NM_001774      | 19q13.3       | CD37 molecule                                                 | -3,33                    |
| PTPN22      | 7918657      | NM_015967      | 1p13.3-p13.1  | protein tyrosine phosphatase, non-receptor type 22 (lymphoid) | -3,25                    |
| SLC44A2     | 8025672      | NM_020428      | 19p13.1       | solute carrier family 44, member 2                            | -3,15                    |
| TARP        | 8139100      | M30894         | 7p15-p14      | TCR gamma alternate reading frame protein                     | -3,12                    |
| PEPD        | 8036010      | NM_000285      | 19q12-q13.2   | peptidase D                                                   | -3,10                    |
| BST2        | 8035304      | NM_004335      | 19p13.2       | bone marrow stromal cell antigen 2                            | -3,09                    |
| ENTPD1      | 7929511      | NM_001776      | 10q24         | ectonucleoside triphosphate diphosphohydrolase 1              | -3,05                    |
| FPR2        | 8030860      | NM_001462      | 19q13.3-q13.4 | formyl peptide receptor 2                                     | -3,01                    |
| OCLN        | 8105908      | NM_002538      | 5q13.1        | occludin                                                      | -2,97                    |
| NRP2        | 8047738      | NM_201266      | 2q33.3        | neuropilin 2                                                  | -2,97                    |
| ERRFI1      | 7912157      | NM_018948      | 1p36          | ERBB receptor feedback inhibitor 1                            | -2,94                    |
| FUCA1       | 7913694      | NM_000147      | 1p34          | fucosidase, alpha-L- 1, tissue                                | -2,92                    |
| MGAM        | 8136662      | NM_004668      | 7q34          | maltase-glucoamylase (alpha-glucosidase)                      | -2,89                    |
| GLIPR2      | 8155192      | NM_022343      | 9p13-p12      | GLI pathogenesis-related 2                                    | -2,89                    |
| STXBP1      | 8158059      | NM_003165      | 9q34.1        | syntaxin binding protein 1                                    | -2,80                    |
| SMPDL3B     | 7899407      | NM_014474      | 1p35.3        | sphingomyelin phosphodiesterase,                              | -2,67                    |

| acid-like 3B |         |              |                 |                                                                                                              |       |
|--------------|---------|--------------|-----------------|--------------------------------------------------------------------------------------------------------------|-------|
| RAB13        | 7963986 | NM_002870    | 1q21.2          | RAB13, member RAS oncogene family                                                                            | -2,61 |
| GNA11        | 8024557 | NM_002067    | 19p13.3         | guanine nucleotide binding protein (G protein), alpha 11 (Gq class) protein (G protein), alpha 11 (Gq class) | -2,58 |
| CABLES1      | 8020495 | NM_138375    | 18q11.2         | Cdk5 and Abl enzyme substrate 1                                                                              | -2,58 |
| TMEM205      | 8034210 | NM_198536    | 19p13.2         | transmembrane protein 205                                                                                    | -2,53 |
| PRG2         | 7948221 | NM_002728    | 11q12           | proteoglycan 2, bone marrow (natural killer cell activator, eosinophil granule major basic protein)          | -2,52 |
| TPCN1        | 7958960 | NM_001143819 | 12q24.13        | two pore segment channel 1                                                                                   | -2,49 |
| ASS1         | 8158671 | NM_000050    | 9q34.1          | argininosuccinate synthetase 1                                                                               | -2,49 |
| PTCH1        | 8162533 | NM_001083603 | 9q22.3          | patched homolog 1 (Drosophila)                                                                               | -2,45 |
| LPHN1        | 8034783 | NM_001008701 | 19p13.2         | latrophilin 1                                                                                                | -2,44 |
| MOSC2        | 7909866 | NM_017898    | 1q41            | MOCO sulphurase C-terminal domain containing 2                                                               | -2,42 |
| CDA          | 7898655 | NM_001785    | 1p36.2-p35      | cytidine deaminase                                                                                           | -2,41 |
| ADARB1       | 8069178 | NR_027673    | 21q22.3         | adenosine deaminase, RNA-specific, B1 (RED1 homolog rat)                                                     | -2,40 |
| CCL4L1       | 8006621 | NM_001001435 | 17q12           | chemokine (C-C motif) ligand 4-like 1                                                                        | -2,40 |
| TYROBP       | 8036224 | NM_003332    | 19q13.1         | TYRO protein tyrosine kinase binding protein                                                                 | -2,38 |
| CYP2S1       | 8028991 | NM_030622    | 19q13.1         | cytochrome P450, family 2, subfamily S, polypeptide 1                                                        | -2,38 |
| ZNF57        | 8024532 | NM_173480    | 19p13.3         | zinc finger protein 57                                                                                       | -2,36 |
| GALR2        | 8010030 | NM_003857    | 17q25.3         | galanin receptor 2                                                                                           | -2,32 |
| PCSK6        | 7991602 | NM_002570    | 15q26.3         | proprotein convertase subtilisin/kexin type 6                                                                | -2,31 |
| CYP4F3       | 8026456 | NM_000896    | 19p13.2         | cytochrome P450, family 4, subfamily F, polypeptide 3                                                        | -2,29 |
| CLEC5A       | 8143471 | NM_013252    | 7q33            | C-type lectin domain family 5, member A                                                                      | -2,26 |
| BCAT2        | 8038202 | NM_001190    | 19q13           | branched chain aminotransferase 2, mitochondrial                                                             | -2,24 |
| SBF2         | 7946516 | NM_030962    | 11p15.4         | SET binding factor 2                                                                                         | -2,24 |
| GPR114       | 7996064 | NM_153837    | 16q21           | G protein-coupled receptor 114                                                                               | -2,23 |
| ICAM3        | 8033987 | NM_002162    | 19p13.3-p13.2   | intercellular adhesion molecule 3                                                                            | -2,21 |
| CD9          | 7953291 | NM_001769    | 12p13.3         | CD9 molecule                                                                                                 | -2,20 |
| CD4          | 7953428 | NM_000616    | 12pter-p12      | CD4 molecule                                                                                                 | -2,20 |
| OLR1         | 7961142 | NM_002543    | 12p13.2-p12.3   | oxidized low density lipoprotein (lectin-like) receptor 1                                                    | -2,19 |
| PHACTR3      | 8063739 | NM_080672    | 20q13.32-q13.33 | phosphatase and actin regulator 3                                                                            | -2,17 |
| PTPRU        | 7899562 | NM_133178    | 1p35.3-p35.1    | protein tyrosine phosphatase, receptor type, U                                                               | -2,17 |
| ZNF252       | 8153935 | NR_023392    | 8q24.3          | zinc finger protein 252                                                                                      | -2,14 |
| PADI2        | 7912937 | NM_007365    | 1p36.13         | peptidyl arginine deiminase, type II                                                                         | -2,13 |
| SLC24A6      | 7966600 | NM_024959    | 12q24.13        | solute carrier family 24 (sodium/potassium/calcium)                                                          | -2,12 |

|          |         |           |         |                                                                        |       |
|----------|---------|-----------|---------|------------------------------------------------------------------------|-------|
|          |         |           |         | exchanger), member 6                                                   |       |
| RASGRP4  | 8036503 | NM_170604 | 19q13.1 | RAS guanyl releasing protein 4                                         | -2,12 |
| PLD3     | 8028791 | NM_012268 | 19q13.2 | phospholipase D family, member 3                                       | -2,11 |
| S100P    | 8093950 | NM_005980 | 4p16    | S100 calcium binding protein P                                         | -2,09 |
| GNG7     | 8032509 | NM_052847 | 19p13.3 | guanine nucleotide binding protein (G protein), gamma 7                | -2,05 |
| STK32B   | 8093858 | NM_018401 | 4p16.2  | serine/threonine kinase 32B                                            | -2,03 |
| ID1      | 8061564 | NM_181353 | 20q11   | inhibitor of DNA binding 1, dominant negative helix-loop-helix protein | -2,03 |
| S100A9   | 7905571 | NM_002965 | 1q21    | S100 calcium binding protein A9                                        | -2,02 |
| PADI4    | 7898448 | NM_012387 | 1p36.13 | peptidyl arginine deiminase, type IV                                   | -2,02 |
| SIGLECP3 | 8030796 | NR_002804 | 19q13.3 | sialic acid binding Ig-like lectin, pseudogene 3                       | -2,01 |

### **Up-Regulated Genes**

| Gene Symbol | Probe Set ID | Gene Accession  | Cytoband    | Gene Description                                                                                                                          | log2 (R /WT) |
|-------------|--------------|-----------------|-------------|-------------------------------------------------------------------------------------------------------------------------------------------|--------------|
| CCL2        | 8006433      | NM_002982       | 17q11.2-q12 | chemokine (C-C motif) ligand 2                                                                                                            | 4,25         |
| KYNU        | 8045539      | NM_003937       | 2q22.2      | kynureninase (L-kynurenine hydrolase)                                                                                                     | 4,14         |
| NCALD       | 8152119      | NM_001040624    | 8q22.2      | neurocalcin delta                                                                                                                         | 3,15         |
| CD38        | 8094240      | NM_001775       | 4p15        | CD38 molecule                                                                                                                             | 3,01         |
| DUSP6       | 7965335      | NM_001946       | 12q22-q23   | dual specificity phosphatase 6                                                                                                            | 2,89         |
| LOC643332   | 7973108      | ENST00000258817 | 14q11.2     | similar to Nonsecretory ribonuclease precursor (Ribonuclease US) (Eosinophil-derived neurotoxin) (RNase UpI-2) (Ribonuclease 2) (RNase 2) | 2,86         |
| ALOX5AP     | 7968344      | NM_001629       | 13q12       | arachidonate 5-lipoxygenase-activating protein                                                                                            | 2,84         |
| CIB2        | 7990674      | NM_006383       | 15q24       | calcium and integrin binding family member 2                                                                                              | 2,82         |
| GTSF1       | 7963817      | NM_144594       | 12q13.13    | gametocyte specific factor 1                                                                                                              | 2,67         |
| SDC2        | 8147461      | NM_002998       | 8q22-q23    | syndecan 2                                                                                                                                | 2,37         |
| NEO1        | 7984704      | NM_002499       | 15q22.3-q23 | neogenin homolog 1 (chicken)                                                                                                              | 2,34         |
| VCAN        | 8106743      | NM_004385       | 5q14.3      | versican                                                                                                                                  | 2,31         |
| CXCL14      | 8114249      | NM_004887       | 5q31        | chemokine (C-X-C motif) ligand 14                                                                                                         | 2,31         |
| CBR1        | 8068401      | NM_001757       | 21q22.13    | carbonyl reductase 1                                                                                                                      | 2,27         |
| METTL9      | 7993833      | NM_016025       | 16p13-p12   | methyltransferase like 9                                                                                                                  | 2,24         |
| GNG11       | 8134257      | NM_004126       | 7q21        | guanine nucleotide binding protein (G protein), gamma 11                                                                                  | 2,16         |
| PDGFA       | 8137670      | NM_002607       | 7p22        | platelet-derived growth factor alpha polypeptide                                                                                          | 2,04         |
| HLA-DRA     | 8178193      | NM_019111       | 6p21.3      | major histocompatibility complex, class II, DR alpha                                                                                      | 2,03         |
